# Supplementary material
Source: publisher figshare collection journal article supplement (https://gsajournals.figshare.com/articles/dataset/_/7390451)
Supplement: Supplementary file 1 [file 2]

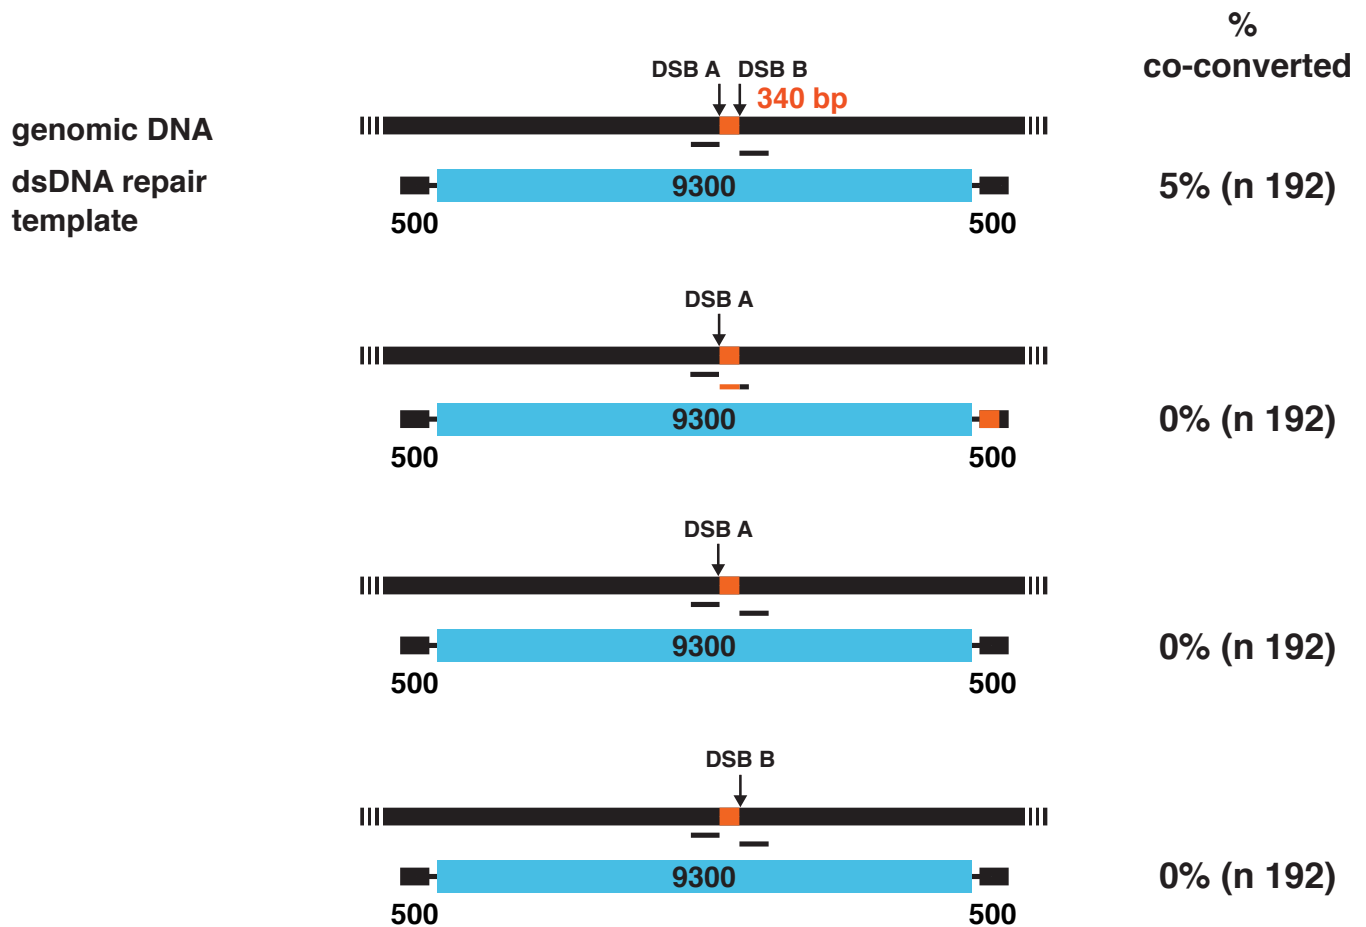

**Figure S2 Insertion of large DNA fragments via double-stranded templates is infrequent at a single Cas9 cleavage site**

The strategy of using two guide RNAs and hence two DSBs 340 bp apart (orange bar) to insert large (9300 bp) fluorescent reporter transgenes into an endogenous site using a plasmid-based double-stranded repair template with 500 bp homology arms was successful in experiments with *dpy-10* as the co-conversion marker. See also Figure 5. However, co-conversion experiments were unsuccessful for inserting large stretches of DNA if they involved only one of the two guide RNAs and three different sets of 500 bp homology arms, as represented by the black and orange-black lines below the genomic DNA diagram.
